# Supplementary material for: Leishmania amazonensis-Induced cAMP Triggered by Adenosine A2B Receptor Is Important to Inhibit Dendritic Cell Activation and Evade Immune Response in Infected Mice
Source: Front Immunol. 2017 Jul 25;8:849. doi: 10.3389/fimmu.2017.00849 (PMC5524897; doi:10.3389/fimmu.2017.00849)
Supplement: Supplementary file 1 [file presentation_1.pdf]

## *Supplementary Material*

### ***Leishmania amazonensis*-induced cAMP triggered by adenosine A<sub>2B</sub> receptor is important to inhibit dendritic cell activation and evade immune response in infected mice**

**Amanda Braga Figueiredo<sup>1</sup>, Míriam Conceição Souza-Testasica<sup>1,2</sup>, Tiago Wilson Patriarca Mineo<sup>3</sup>, Luís Carlos Crocco Afonso<sup>1,\*</sup>**

<sup>1</sup> Laboratório de Imunoparasitologia, ICEB / NUPEB, Universidade Federal de Ouro Preto. Ouro Preto, Brazil.

<sup>2</sup> Coordenadoria da Área de Ciências Biológicas, Instituto Federal de Minas Gerais, Campus Ouro Preto. Ouro Preto, Brazil.

<sup>3</sup> Laboratório de Imunoparasitologia “Dr. Mario Endsfieldz Camargo”, ICBIM, Universidade Federal de Uberlândia. Uberlândia, Brazil.

\* **Correspondence:** Dr. Luís Carlos Crocco Afonso. Address: Laboratório de Imunoparasitologia, Departamento de Ciências Biológicas, ICEB / NUPEB, Universidade Federal de Ouro Preto, Campus do Morro do Cruzeiro, 35400-000, Ouro Preto, Minas Gerais, Brazil. Phone number: +55 31 3559 1701. Fax Number: +55 31 3559 1680. E-mail address:afonso@nupeb.ufop.br.

## **Supplementary Material and Methods**

### ***Intracellular calcium measurement***

Cells were washed twice with Ca<sup>2+</sup>- and Mg<sup>2+</sup>-free HBSS, pH 7.4 and incubated with 5 µM Oregon Green 488® BABTA-1 (Molecular Probes, Eugene, OR, EUA) at room temperature for 1 h in the dark. Cells were washed twice in Ca<sup>2+</sup>- and Mg<sup>2+</sup>-free HBSS, pH 7.4, resuspended in RPMI-1640 supplemented with 10% FCS, 2 mM L-glutamine, 100 U/mL penicillin G potassium, and 50 µM β-mercaptoethanol, pH 7.2 and left 30 min at room temperature. Metacyclic promastigotes and DC were co-incubated as already described, at 33°C / 5% CO<sub>2</sub> for 15 min and subsequently analyzed using BD FACSCalibur™ flow cytometer. The baseline fluorescence was measured for 1 min at 33°C, cells were stimulated with 1 µM 5'-(N-ethylcarboxamido) adenosine (NECA, Sigma-Aldrich) and fluorescence immediately measured for 3 min at 33°C, then cells were stimulated with 1 µg/mL ionomycin and fluorescence immediately measured for more 2 min at 33°C. Cell acquisition was performed using BD CellQuest™ Pro software. Data analysis was performed using FlowJo software (Tree Star, Ashland, OR, USA).

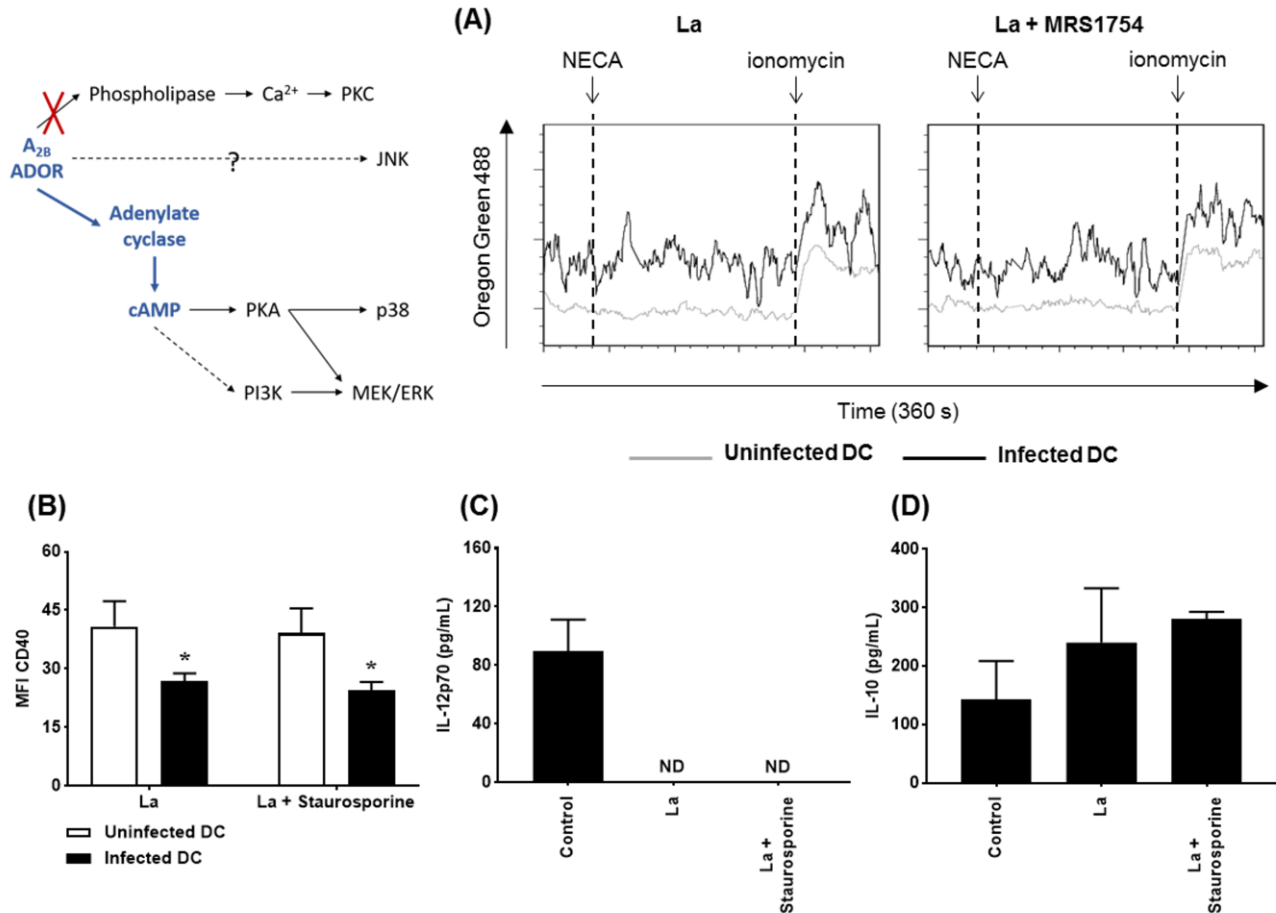

**Supplementary Figure 1. *L. amazonensis* infection stimulates intracellular calcium accumulation by DC by mechanisms independent on adenosine A<sub>2B</sub> receptor.** (A) DC obtained after 9 days of culture with GM-CSF were infected with metacyclic promastigotes (1:3 cell to parasite ratio). (A) DC were loaded with Oregon Green 488 as described in Materials and methods and infected with PKH26-labelled *L. amazonensis* metacyclic promastigotes, in the presence of 5  $\mu$ M MRS1754 (adenosine A<sub>2B</sub> receptor antagonist). After 30 min of infection, we evaluated the alterations of the mean of Oregon Green 488 fluorescence prior to and following addition of 1  $\mu$ M NECA (non-selective adenosine receptor agonist) and 1  $\mu$ g/mL ionomycin. DC were gated into populations of uninfected (PKH26<sup>-</sup> cells, gray line) and infected (PKH26<sup>+</sup> cells, black line) cells and the intracellular calcium accumulation monitored in both populations. Graphs are representative of two independent experiments. (B to D) DC were infected in the presence of 5  $\mu$ M MRS or 1  $\mu$ M Staurosporine (PKC inhibitor – Sigma-Aldrich) and CD40 expression and IL-12p70 and IL-10 production evaluated after 20 h. (B) CD11c<sup>+</sup> DC were gated into populations of uninfected (CFSE<sup>-</sup> cells, white bars) and infected (CFSE<sup>+</sup> cells, black bars) cells and the MFI of CD40 analyzed in both populations. IL-12p70 (C) and IL-10 (D) cytokine levels were measured in the supernatants using an ELISA. Control is uninfected DC. ND: not detected. The results represent the mean + SD from three independent experiments. \* p < 0.05 between uninfected and infected DC, two-way ANOVA and Tukey's post-test.

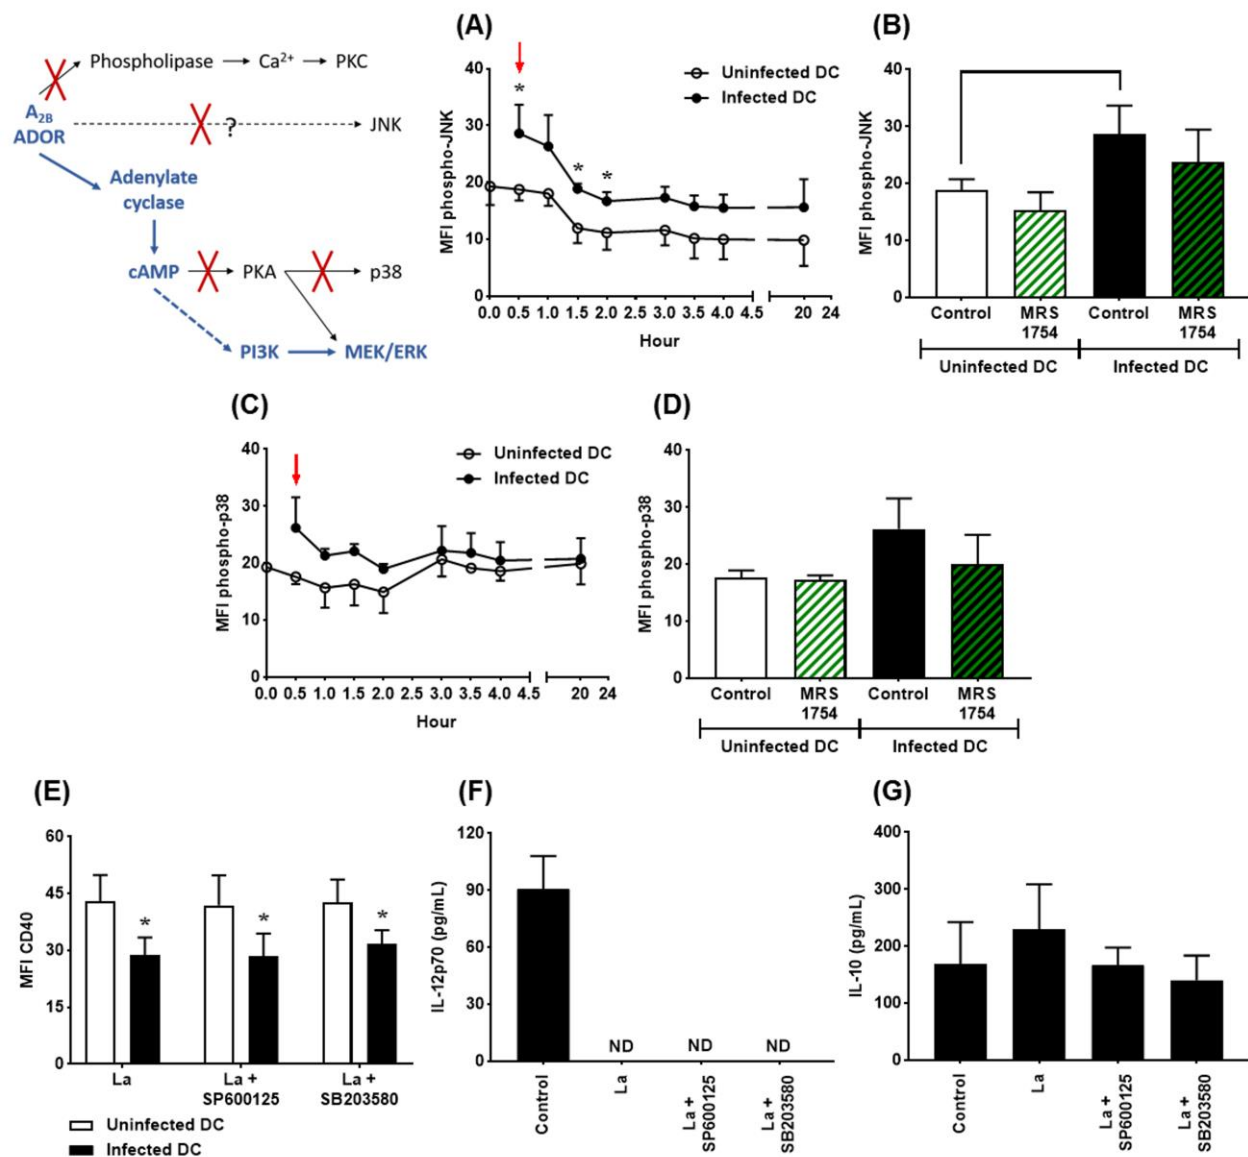

**Supplementary Figure 2. JNK and p38 are not involved in the decrease of CD40 expression and IL-12p70 production by *L. amazonensis*-infected DC.** DC were infected as described in figure S1 and the MFI of phospho-JNK (A) or phospho-p38 (C) analyzed in populations of uninfected and infected DC after multiple periods of infection. After infection, cells were stimulated with 1  $\mu$ M NECA for 15 minutes, fixed and then analyzed by flow cytometry. MFI of phospho-JNK (B) or phospho-p38 (D) in uninfected and infected DC in the absence (Control) or presence of 5  $\mu$ M MRS1754 (adenosine A<sub>2B</sub> receptor antagonist), after 30 min of infection (as shown by arrow in graphs A and C). Antibodies anti-JNK pT183/pY185 (N9-66 clone) and anti-p38 MAPK pT180/pY182 (36/p38 clone) were purchased from BD Phosflow. The results represent the mean + SD from three independent experiments. \* p < 0.05 between uninfected and infected DC or between linked groups, two-way ANOVA and Tukey's post-test. (E to G) DC were infected in the presence of 5  $\mu$ M MRS1754 or 50  $\mu$ M SP600125 (JNK inhibitor – Sigma-Aldrich) or 10  $\mu$ M SB203580 (p38 inhibitor – Tocris Bioscience) and CD40 expression and IL-12p70 and IL-10 production evaluated after 20 h. (E) CD11c<sup>+</sup> DC were gated into populations of uninfected (CFSE<sup>-</sup> cells, white bars) and infected (CFSE<sup>+</sup> cells,

black bars) cells and the MFI of CD40 analyzed in both populations. IL-12p70 (F) and IL-10 (G) cytokine levels were measured in the supernatants using an ELISA. Control is uninfected DC. ND: not detected. The results represent the mean + SD from four independent experiments. \*  $p < 0.05$  between uninfected and infected DC, two-way ANOVA and Tukey's post-test.

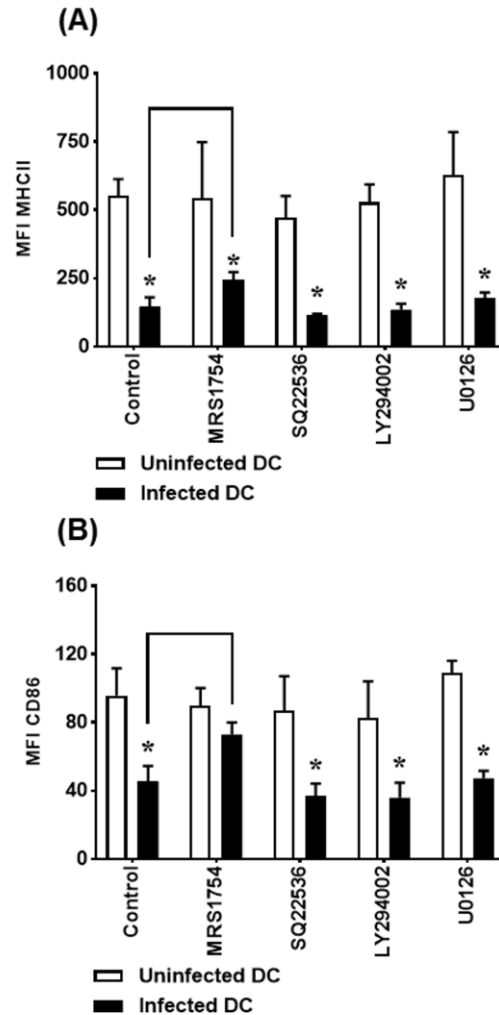

**Supplementary Figure 3. Decrease of MHCII and CD86 expression in *L. amazonensis*-infected DC is independent on AMPc production, PI3K activation and ERK1/2 phosphorylation.** DC were infected as described in figure S1, in the absence (Control) or presence of 5  $\mu$ M MRS1754 (adenosine A<sub>2B</sub> receptor antagonist), 100  $\mu$ M SQ22536 (adenylate cyclase inhibitor), 1  $\mu$ M LY294002 (PI3K inhibitor) or 10  $\mu$ M U0126 (MEK inhibitor). After 20 h of infection, CD11c<sup>+</sup> DC were gated into populations of uninfected (CFSE<sup>-</sup> cells, white bars) and infected (CFSE<sup>+</sup> cells, black bars) cells and the MFI of MHCII (A) or CD86 (B) analyzed in both populations. Antibodies anti-mouse MHCII (M5 114.15.2 clone) and anti-mouse CD86 (GL1 clone) were purchased from eBioscience. The results represent the mean + SD from three independent experiments. \*  $p < 0.05$  between uninfected and infected DC or between linked groups, two-way ANOVA and Tukey's post-test.
